# Supplementary material
Source: ML conference proceedings conference paper supplement (https://openreview.net/forum?id=fV54cBCGEV)

mushrooms

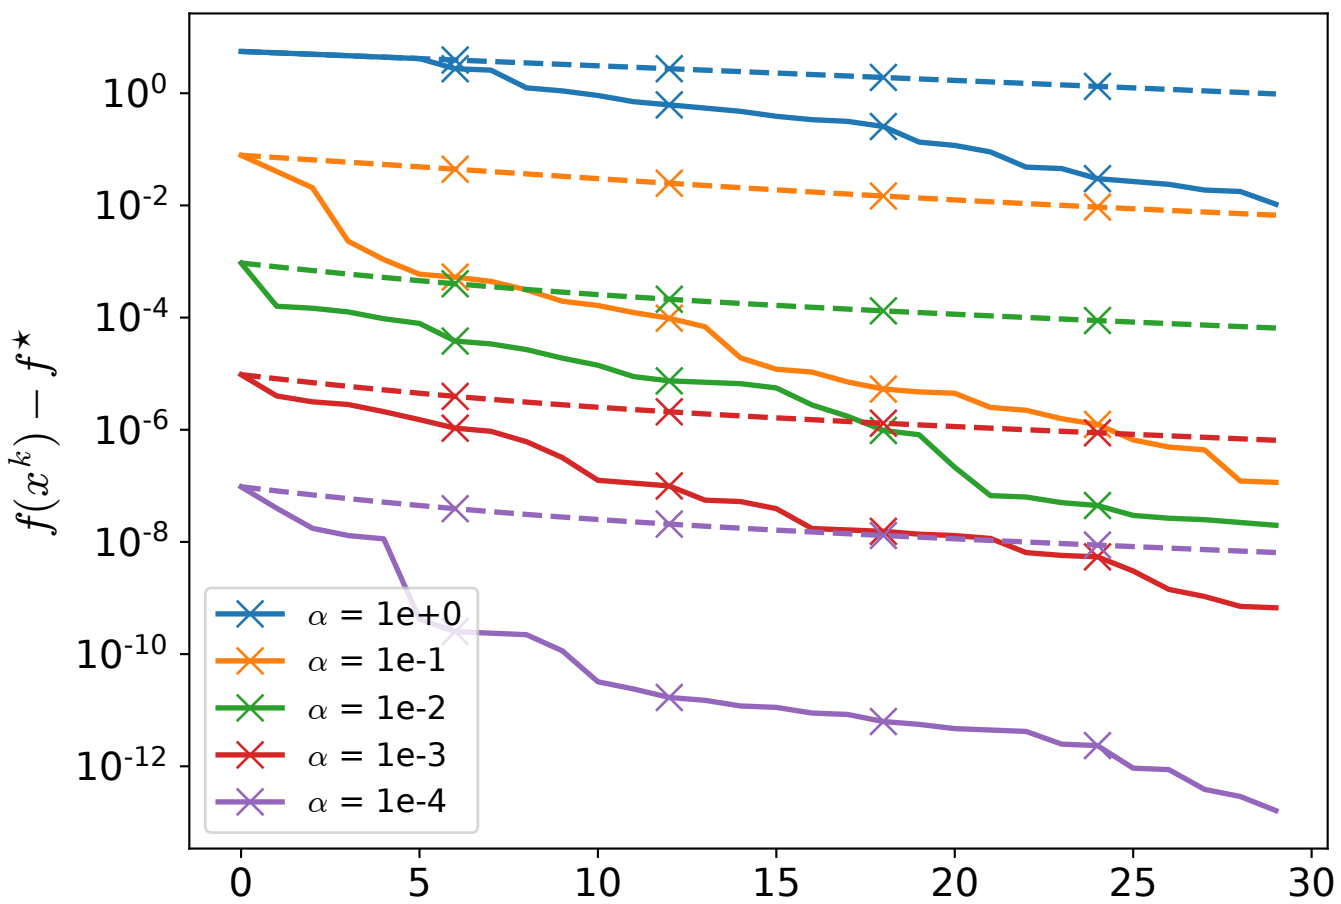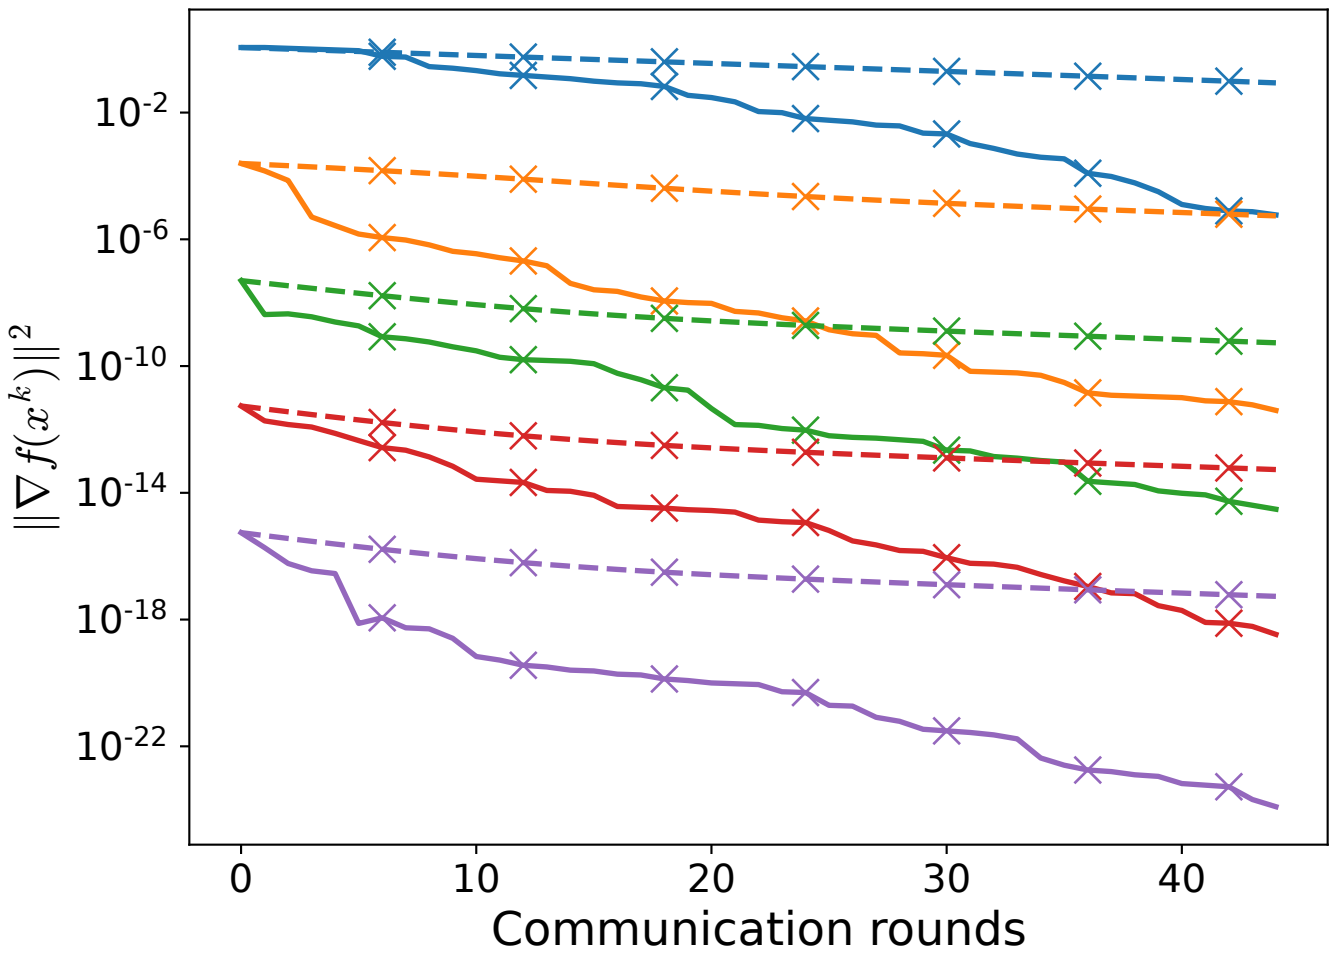

Supplement: supplementary_material [file attachment]

ijcnn1.bz2

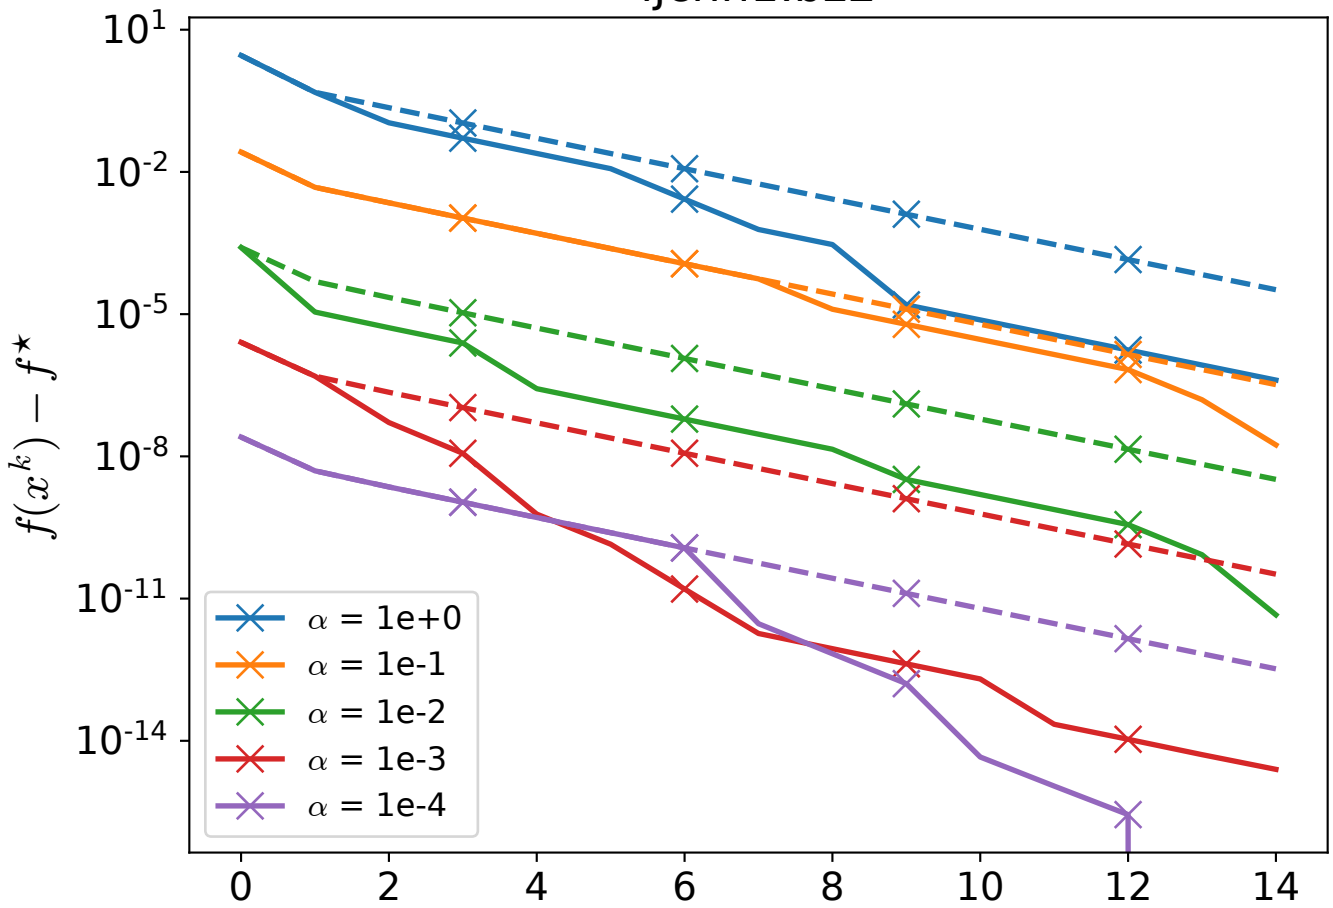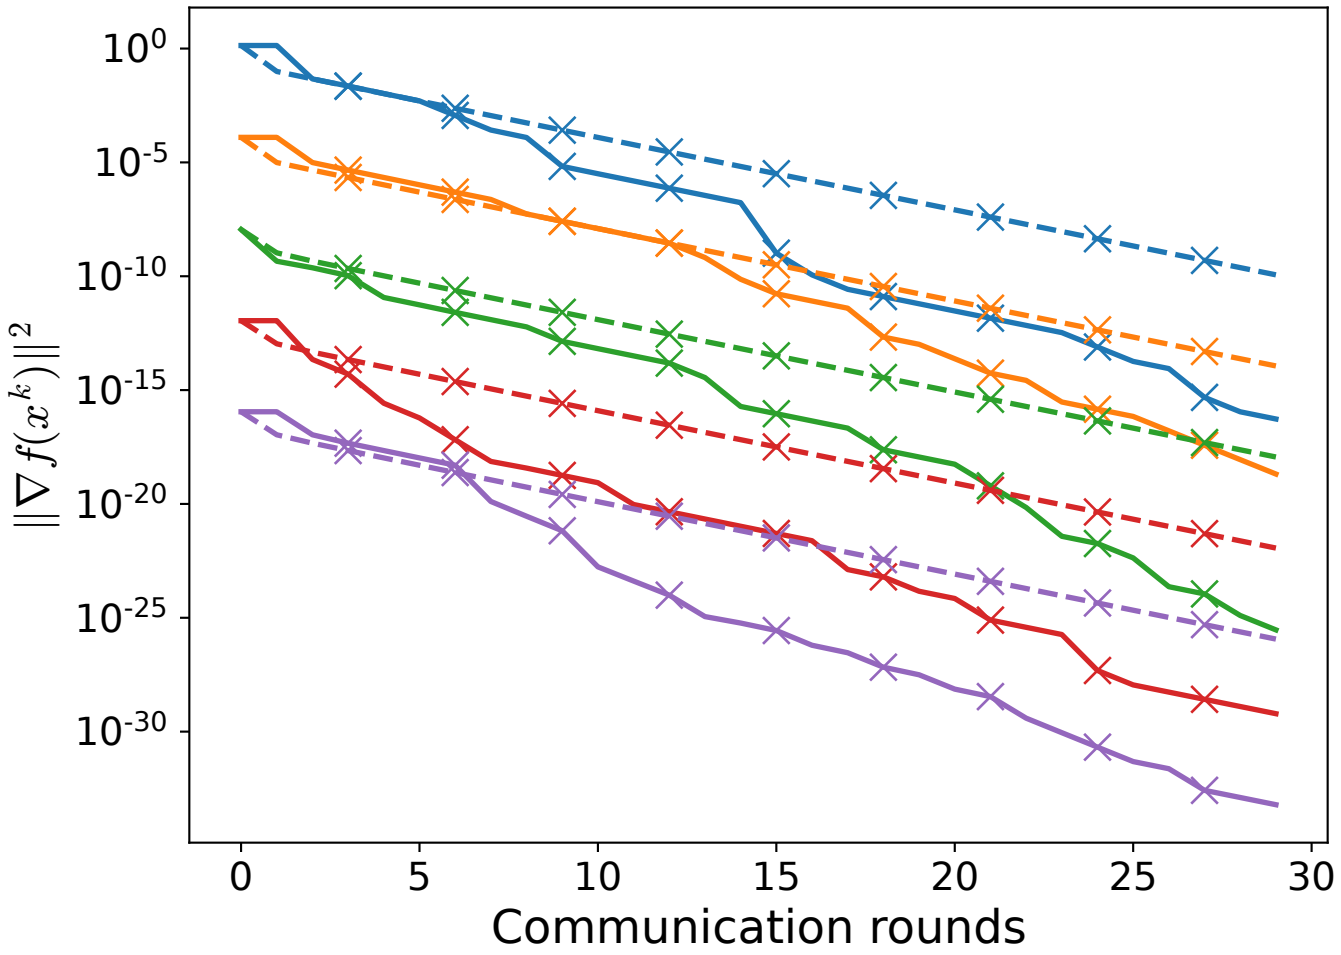

Supplement: supplementary_material [file attachment]

w6a

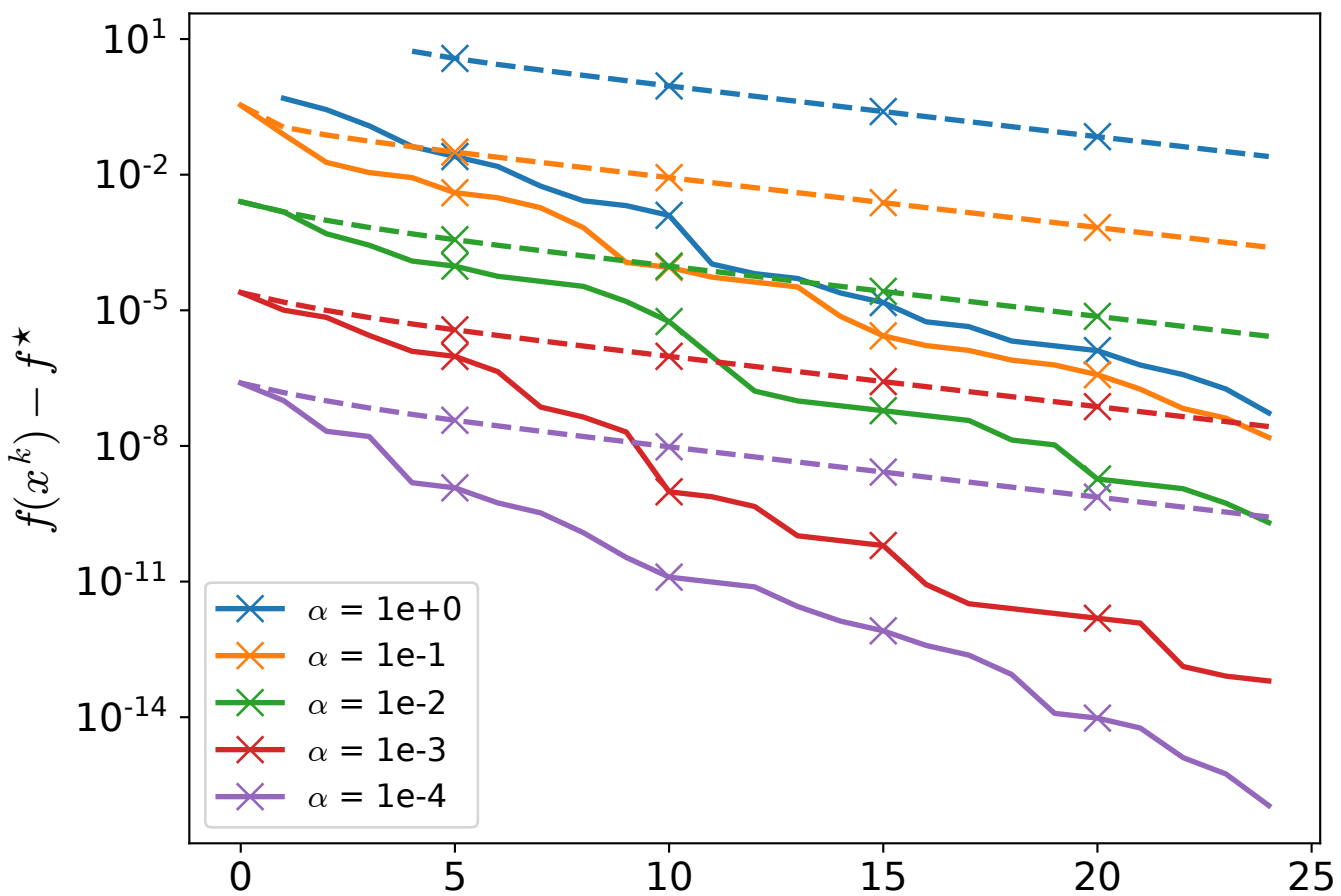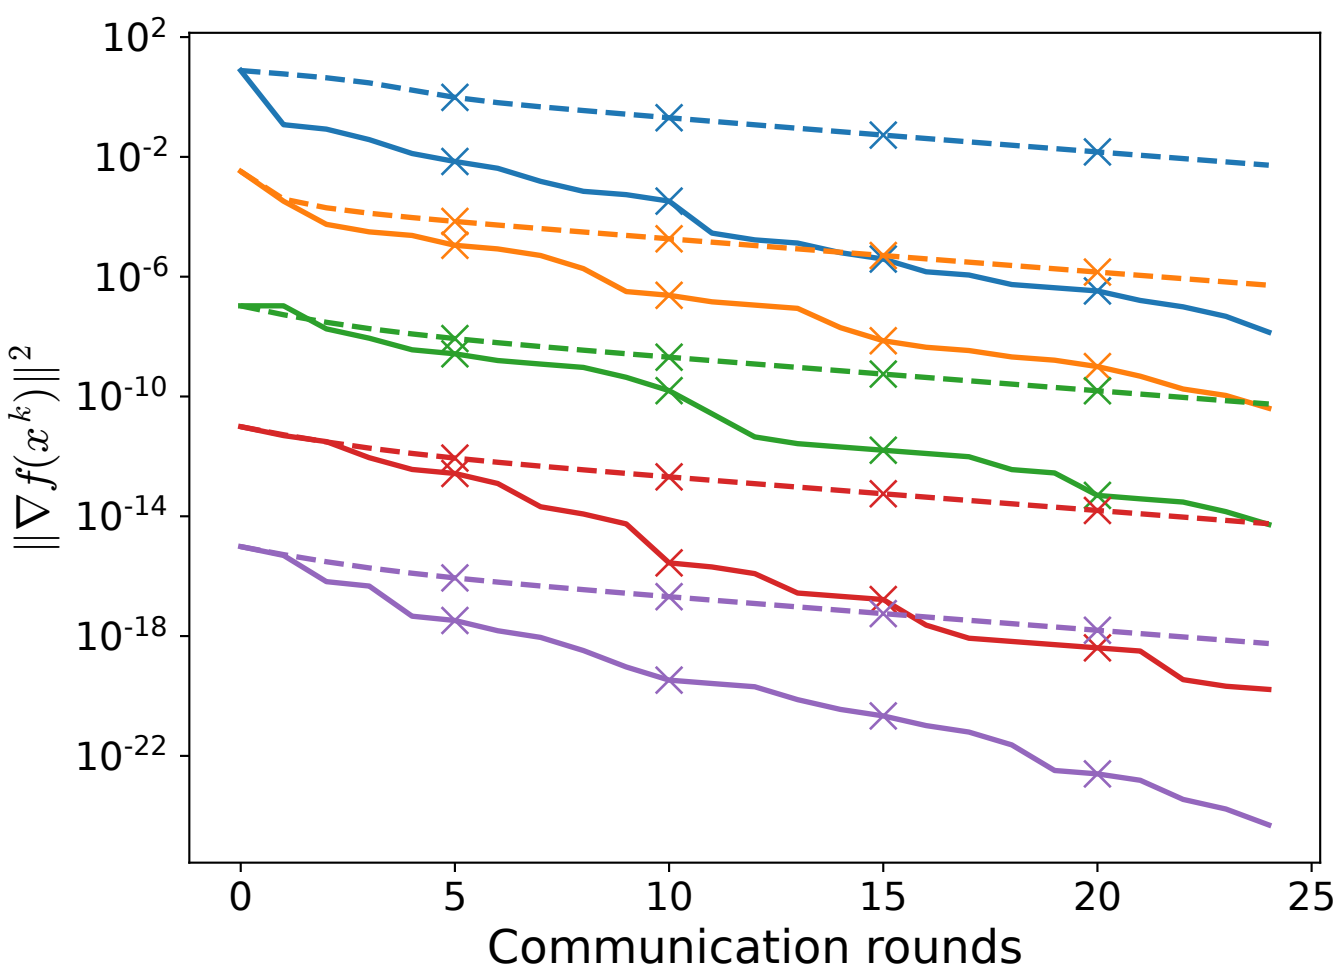

Supplement: supplementary_material [file attachment]

a6a

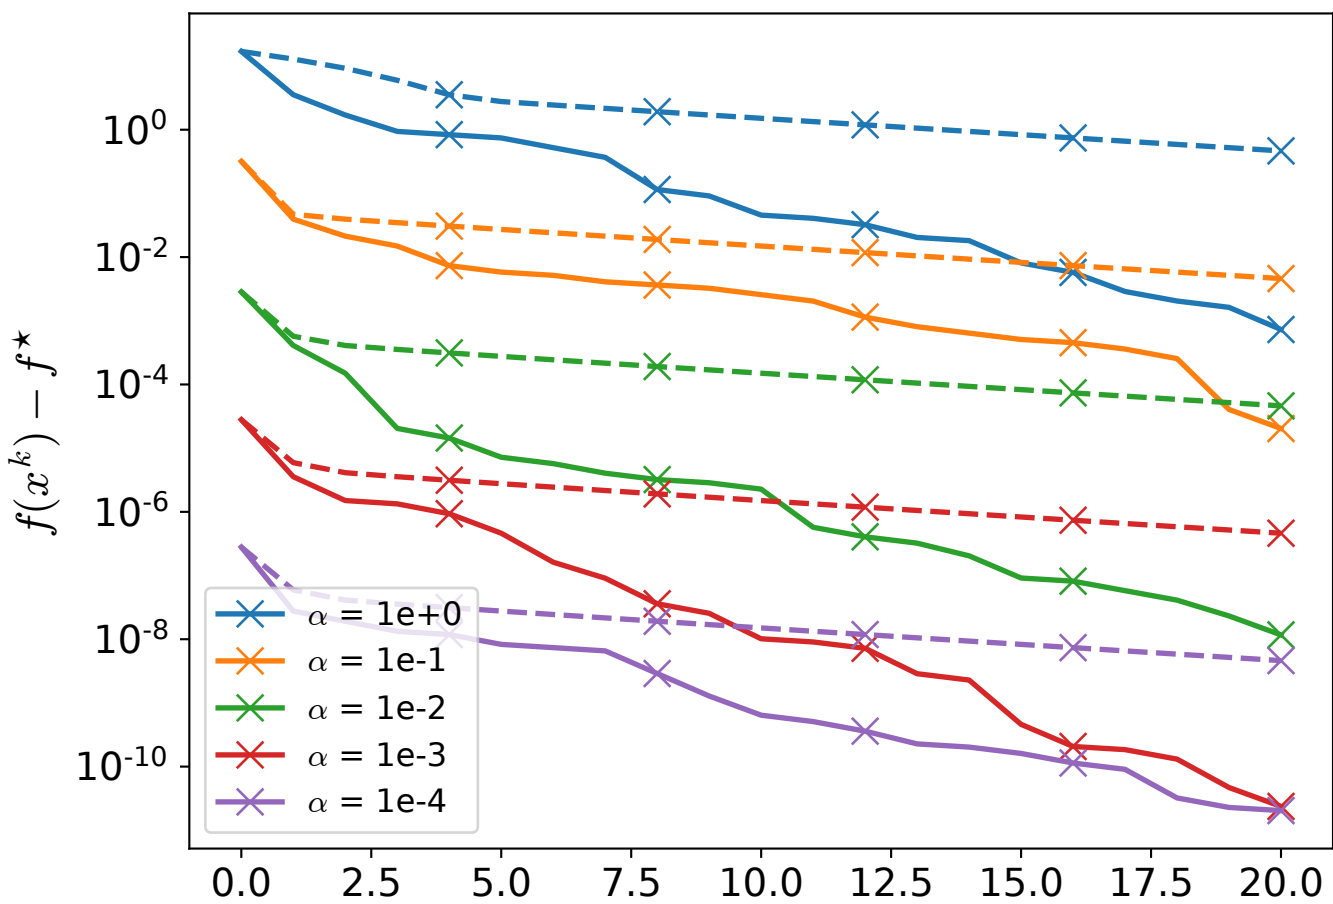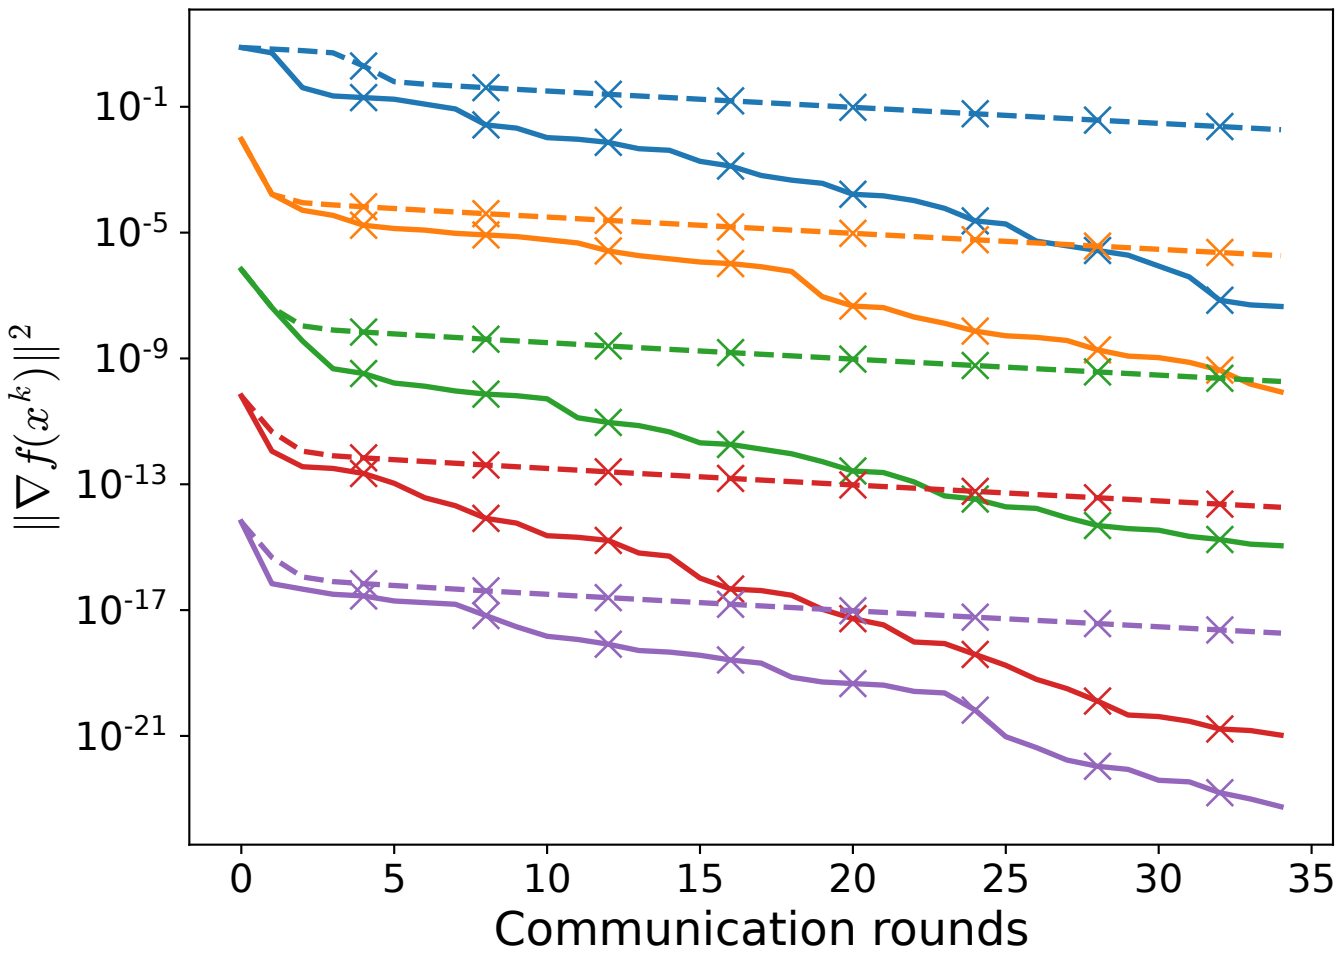

Supplement: supplementary_material [file attachment]
